# Supplementary material
Source: publisher figshare collection journal article supplement (https://sage.figshare.com/ndownloader/files/13085990)
Supplement: Supplementary file 1 [file 13085990]

**eTable 1.** Overview of the measurements used for the secondary analyses from the pre-dialysis, dialysis, and transplant waitlist study cohorts

| <b>Variables</b>             | <b>Pre-dialysis</b>                                                                                                                                                                                                                                                                                                                                                                                                                                                                                                                                                  | <b>Dialysis</b>                                                                                                                                                                                                                                                                                                                                                                                                                                                                                                                                                      | <b>Transplant waitlist</b>                                                                                                                                                                                                                                                                   |
|------------------------------|----------------------------------------------------------------------------------------------------------------------------------------------------------------------------------------------------------------------------------------------------------------------------------------------------------------------------------------------------------------------------------------------------------------------------------------------------------------------------------------------------------------------------------------------------------------------|----------------------------------------------------------------------------------------------------------------------------------------------------------------------------------------------------------------------------------------------------------------------------------------------------------------------------------------------------------------------------------------------------------------------------------------------------------------------------------------------------------------------------------------------------------------------|----------------------------------------------------------------------------------------------------------------------------------------------------------------------------------------------------------------------------------------------------------------------------------------------|
| <b>Interest in LDKT</b>      | On a scale of 0-10, how interested do you think you would be in getting a kidney from your family member?                                                                                                                                                                                                                                                                                                                                                                                                                                                            | On a scale of 0-10, how interested do you think you would be in getting a kidney from your family member?                                                                                                                                                                                                                                                                                                                                                                                                                                                            | On a scale of 0-10, how interested do you think you would be in getting a kidney from your family member?                                                                                                                                                                                    |
| <b>Pursuit of LDKT</b>       | Pursuit of LDKT for the pre-dialysis and dialysis cohorts was assessed by participants self-reported achievement of at least one of five behaviors necessary to complete LDKT, including 1) discussion of living donor kidney transplantation with family members or friends, (2) discussion of living donor kidney transplantation with their physician, (3) initiation of the clinical evaluation for potential LDKT recipients, (4) completion of the clinical evaluation for potential LDKT recipients, and (5) identification of a potential live kidney donor. | Pursuit of LDKT for the pre-dialysis and dialysis cohorts was assessed by participants self-reported achievement of at least one of five behaviors necessary to complete LDKT, including 1) discussion of living donor kidney transplantation with family members or friends, (2) discussion of living donor kidney transplantation with their physician, (3) initiation of the clinical evaluation for potential LDKT recipients, (4) completion of the clinical evaluation for potential LDKT recipients, and (5) identification of a potential live kidney donor. | Pursuit of LDKT for participants in the transplant waitlist cohort was assessed by self-reported achievement of at least one of two behaviors: (1) discussion of living donor kidney transplantation with family members or friends, or (2) identification of a potential live kidney donor. |
| <b>LDKT Knowledge</b>        | Participants' factual knowledge was assessed using 10 true or false questions                                                                                                                                                                                                                                                                                                                                                                                                                                                                                        | Participants' factual knowledge was assessed using 10 true or false questions                                                                                                                                                                                                                                                                                                                                                                                                                                                                                        | Participants' factual knowledge was assessed using 10 true or false questions                                                                                                                                                                                                                |
| <b>Health Literacy</b>       | Health literacy was measured using the Rapid Estimate of Adult Literacy in Medicine (REALM) test <sup>[15]</sup> (66 items) in the pre-dialysis and dialysis cohorts.                                                                                                                                                                                                                                                                                                                                                                                                | Health literacy was measured using the Rapid Estimate of Adult Literacy in Medicine (REALM) test <sup>[15]</sup> (66 items) in the pre-dialysis and dialysis cohorts.                                                                                                                                                                                                                                                                                                                                                                                                | The Rapid Estimate of Adult Literacy in Medicine—Short Form (REALM-SF) <sup>[16]</sup> (7 items) was used to assess literacy in the transplant waitlist cohort.                                                                                                                              |
| <b>Trust in Medical Care</b> | Trust in medical care was explored using 12 questions derived from the Trust in Physician Scale, <sup>[17]</sup> Medical Distrust Index <sup>[18]</sup> , and Healthcare Discrimination survey. <sup>[19]</sup>                                                                                                                                                                                                                                                                                                                                                      | Trust in medical care was explored using 12 questions derived from the Trust in Physician Scale, <sup>[17]</sup> Medical Distrust Index <sup>[18]</sup> , and Healthcare Discrimination survey. <sup>[19]</sup>                                                                                                                                                                                                                                                                                                                                                      | Trust in medical care was explored using 12 questions derived from the Trust in Physician Scale, <sup>[17]</sup> Medical Distrust Index <sup>[18]</sup> , and Healthcare Discrimination survey. <sup>[19]</sup>                                                                              |

LDKT, living donor kidney transplant

**eTable 2.** Characteristics of Outcome and Exposure Variables

|                                                      | Pre-dialysis | Dialysis   | Transplant<br>waitlist |
|------------------------------------------------------|--------------|------------|------------------------|
| n                                                    | 62           | 92         | 155                    |
| Interest in living kidney donation, median [IQR]     | 9 [5-10]     | 10 [5-10]  | 10 [7-10]              |
| Interest in living donation categories               |              |            |                        |
| Don't know                                           | 2 (3.23)     | 0 (0)      | 0 (0)                  |
| Interest < 8                                         | 21 (33.87)   | 30 (32.61) | 40 (25.81)             |
| Interest ≥ 8                                         | 39 (62.9)    | 62 (67.39) | 115 (74.19)            |
| Pursuit                                              |              |            |                        |
| Action                                               | 28 (45.16)   | 67 (72.83) | 143(92.0)              |
| No pursuit                                           | 34 (54.84)   | 25 (27.17) | 12(8.0)                |
| Knowledge, median [IQR]                              | 80 [60-80]   | 70 [70-80] | 80 [70-80]             |
| Realm score, median [IQR]                            | 65 [45-66]   | 62 [57-65] | 7 [6-7]                |
| Realm categories                                     |              |            |                        |
| ≤ 3 <sup>rd</sup> grade: 0-18; 0                     | 5 (8.06)     | 0 (0)      | 8 (5.16)               |
| 4 <sup>th</sup> to 6 <sup>th</sup> grade: 18-44; 1-3 | 7 (11.29)    | 9 (9.78)   | 3 (1.94)               |
| 7 <sup>th</sup> to 8 <sup>th</sup> grade: 45-60 ;4-6 | 7 (11.29)    | 27 (29.35) | 44 (28.39)             |
| ≥ 9 <sup>th</sup> grade: 61-66; 7                    | 36 (58.06)   | 46 (50.0)  | 81 (52.26)             |

Note: Data are presented as median (interquartile range) or number (percentage).
